# Supplementary material for: Construction of a polymeric cobalt phthalocyanine@mesoporous graphitic carbon nitride composite for efficient photocatalytic CO2reduction
Source: Royal Society of Chemistry journal article supplement (doi:10.1039/d1cc02468j), 2021-01-01
Supplement: d1cc02468j1.pdf [file d1cc02468j1.pdf]

Electronic Supplementary Information (ESI) for

**Construction of Polymeric Cobalt Phthalocyanine/Mesoporous Graphitic Carbon Nitride Composite for Efficient Photocatalytic CO<sub>2</sub> Reduction**

Hongwei Li<sup>a</sup>, Wei Xu<sup>a</sup>, Jinjie Qian<sup>b,\*</sup>, Ting-Ting Li<sup>a,c,\*</sup>

<sup>a</sup>School of Materials Science and Chemical Engineering, Ningbo University, Ningbo 315211, China.

<sup>b</sup>College of Chemistry and Materials Engineering, Wenzhou University, Wenzhou 325000, China.

<sup>c</sup>Key Laboratory of Advanced Mass Spectrometry and Molecular Analysis of Zhejiang Province, Ningbo University, Ningbo 315211, China.

## **Experimental section**

### **Chemicals and Materials.**

Cyan diamide, 1,2,4,5-tetracyanobenzene,  $\text{CoCl}_2 \cdot 6\text{H}_2\text{O}$ , 1,8-diazabicyclo [5.4.0] undec-7-ene (DBU), isopropanol, absolute ethanol, ammonium hydrogen fluoride ( $\text{NH}_4\text{HF}_2$ ) and triethanolamine (TEOA) were commercially obtained from Sigma-Aldrich Co., Ltd. without further purification. 40 % dispersion of colloidal  $\text{SiO}_2$  particles (LUDOX HS-40) were purchased from Aldrich Co., Ltd, and the sizes of  $\text{SiO}_2$  particles are 12 nm. Fluorine-doped tin oxide (FTO) glasses were purchased from Dalian Heptachroma Co., Ltd. All the aqueous solutions were prepared using Milli-Q ultrapure water ( $> 18 \text{ M}\Omega$ ).

### **Preparation of mpg- $\text{C}_3\text{N}_4$ .**

Firstly, cyanamide was added into the dispersion of  $\text{SiO}_2$  particles in water, the ratio of  $\text{SiO}_2$  to cyanamide is 2:1. The obtained mixture was stirred at 333 K overnight to afford white powder. The solid was heated to 823 K with a heating rate of  $2.3 \text{ K min}^{-1}$  and kept this temperature over 4 h, the resulting brown-yellow powder was added to an aqueous  $\text{NH}_4\text{HF}_2$  solution (4 M) to remove the  $\text{SiO}_2$  template. The obtained powder was collected by centrifugation and washed with water and absolute ethanol. Finally, the mpg- $\text{C}_3\text{N}_4$  sample was dried at 343 K in a vacuum oven overnight.

### **Preparation of CoPPc@mpg- $\text{C}_3\text{N}_4$ .**

In a typical experiment, 60 mg of mpg- $\text{C}_3\text{N}_4$  was dispersed in 40 mL of EtOH with the assistance of sonication, and 40 mg of  $\text{CoCl}_2 \cdot 6\text{H}_2\text{O}$ , 43 mg of DBU, and 60 mg of 1,2,4,5-tetracyanobenzene were added, and the obtained suspension was sonicated for 30 min. The suspension was then transferred to a Teflon-lined autoclave for solvothermal reaction at  $180 \text{ }^\circ\text{C}$  for 8 h. After cooling to room temperature, CoPPc@mpg- $\text{C}_3\text{N}_4$  was collected by centrifugation and washed repeatedly with ethanol and water, and finally dried at  $60 \text{ }^\circ\text{C}$  in a vacuum oven.

### **Instrumentations and characterizations.**

Powder X-ray diffraction (PXRD) patterns of the samples were recorded on an X-ray diffractometer (Bruker D8 Advance) at 1600 W (40 kV voltage, 40 mA) power with

Cu K $\alpha$  radiation. The Co content of CoPPc@mpg-C<sub>3</sub>N<sub>4</sub> was determined using inductively coupled plasma optical emission spectrum (ICP-OES, Agilent 725). Fourier transform infrared (FT-IR) spectra were collected on an FT-IR spectrometer (NICOLET 6700) with a frequency range of 4000~450 cm<sup>-1</sup>. Raman spectra were collected from a Renishaw inVia Raman spectrometer with an incident laser of 633 nm. Scanning electron microscopy (SEM) was performed on a Hitachi S-4800 field emission scanning electron microscope (20 kV). Transmission electron microscopy (TEM) and high-resolution transmission electron microscopy (HRTEM) were performed on a JEOL JEM-2100 electron microscope equipped with an EDS detector at an accelerated voltage of 200 kV. Nitrogen adsorption-desorption isotherms were recorded at 77 K using an Accelerated Surface Area and Porosimetry 2020 (ASAP2020) adsorption apparatus. X-ray photoelectron spectroscopy (XPS) was carried out on a Thermo Fisher ESCALAB 250Xi spectrometer using C 1s (284.6 eV) as the reference line. The formed gaseous products were analyzed using a gas chromatography (GC) instrument equipped with a thermal conductivity detector (TCD) and a hydrogen flame ionization detector (FID) with a methanizer.

#### **Photoelectrochemical (PEC) measurements.**

To measure the photocurrent response, photocathodes were prepared as follows. 4 mg of sample was dispersed in 400  $\mu$ L isopropanol containing 10  $\mu$ L 5 wt% Nafion solution by sonication for 30 min. The obtained catalyst ink was dropped on the FTO conductive glass (100  $\mu$ L cm<sup>-1</sup>) and allowed to dry under ambient conditions. PEC measurements were performed in a glass cell equipped with a quartz window using a three-electrode system. A platinum wire and an Ag/AgCl electrode were used as the counter and reference electrodes, respectively. Each photocathode was irradiated using a solar light simulator with a Xe lamp (100 mW cm<sup>-2</sup>) equipped with an air mass 1.5 global filter (AM 1.5G). Prior to each measurement, the electrolyte was purged with CO<sub>2</sub> for 30 min.

#### **Photocatalytic CO<sub>2</sub> reduction experiments.**

Typically, 5 mg of each photocatalyst was added in a 20.0 mL 9:1 MeCN/TEOA in a

quartz photoreactor (total volume 55 mL). The photoreactor was purged with CO<sub>2</sub> for 30 min and then sealed with a rubber septum. The photoreactor was then irradiated using a UV-filtered solar light simulator with a Xe lamp (100 mW cm<sup>-2</sup>, AM 1.5 G,  $\lambda > 400$  nm).

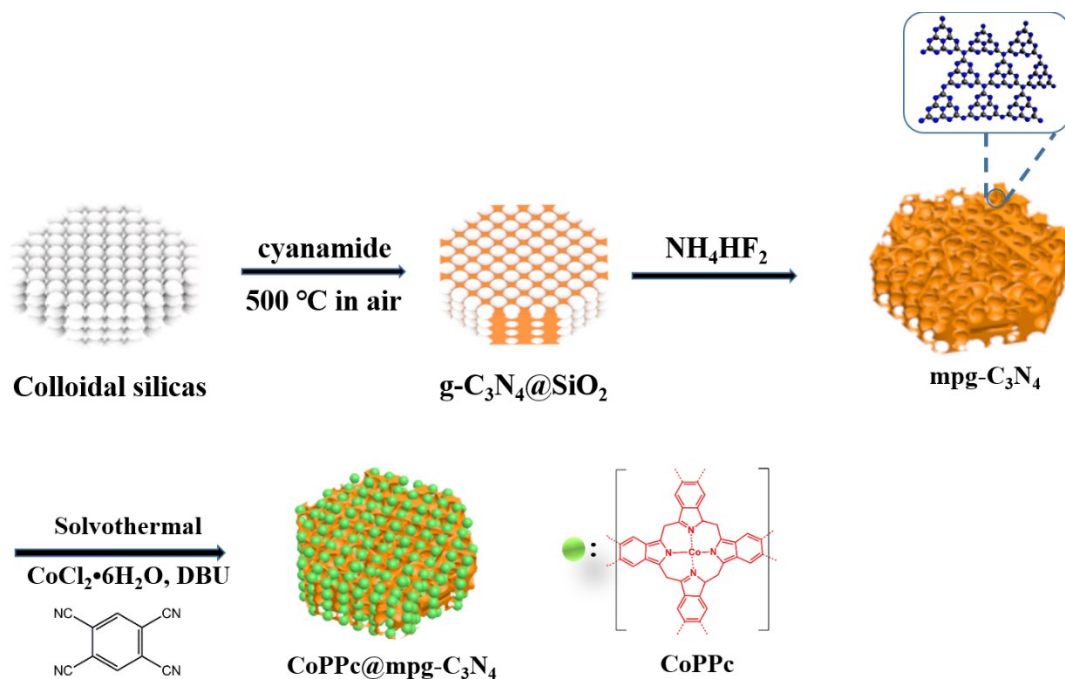

**Figure S1.** Schematic illustration of the in-situ polymerization of CoPPc on mpg-C<sub>3</sub>N<sub>4</sub> via the solvothermal reaction.

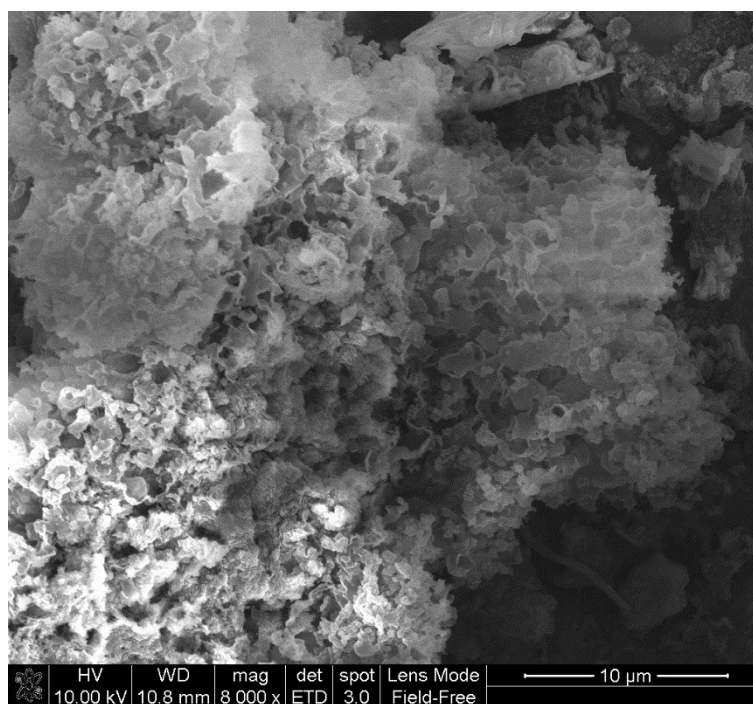

**Figure S2.** SEM image of mpg-C<sub>3</sub>N<sub>4</sub>.

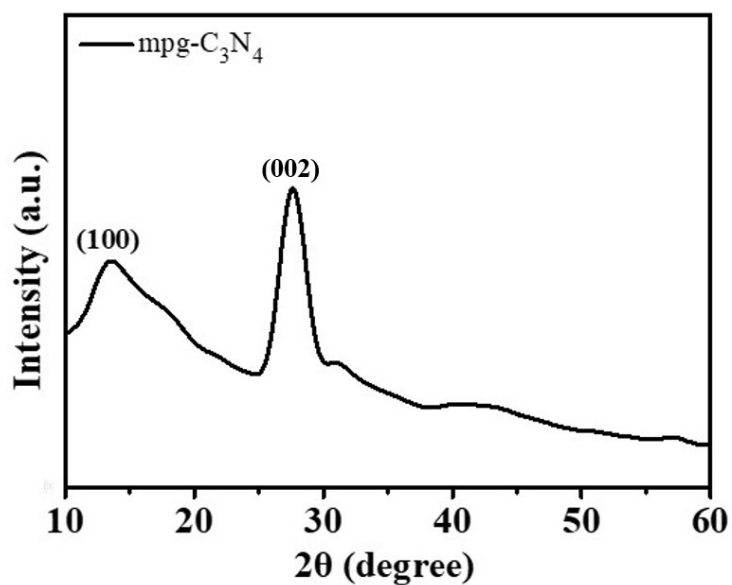

Figure S3. Powder XRD patterns of pristine mpg-C<sub>3</sub>N<sub>4</sub>.

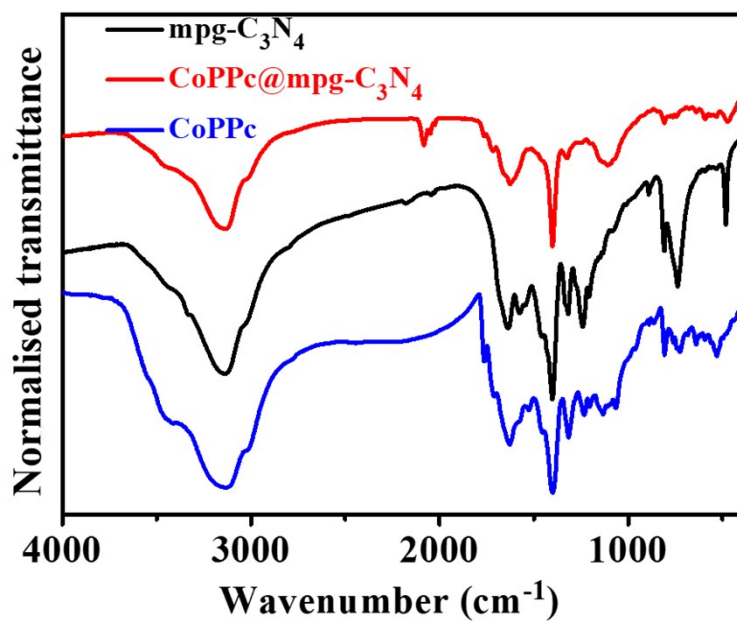

Figure S4. FT-IR spectra of mpg-C<sub>3</sub>N<sub>4</sub>, CoPPc, and CoPPc@mpg-C<sub>3</sub>N<sub>4</sub>.

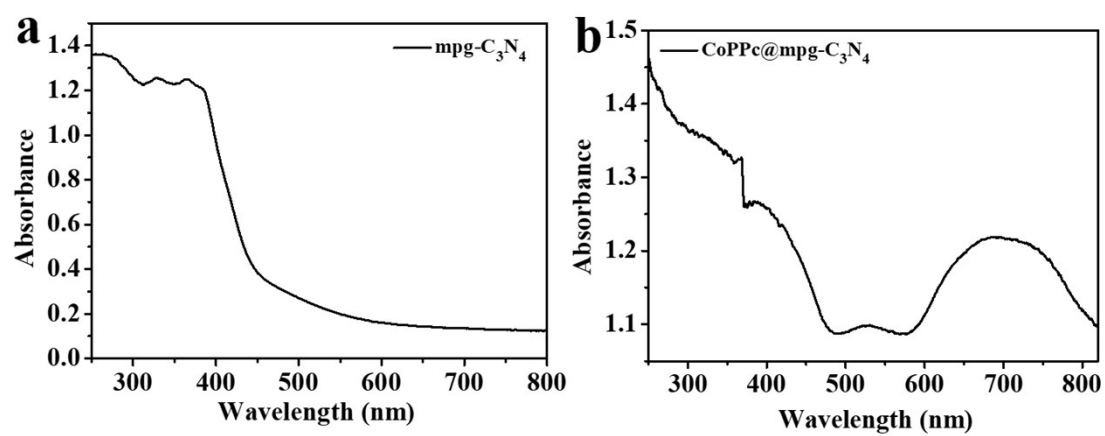

**Figure S5.** UV/Vis absorbance spectra recorded from a) bare mpg-C<sub>3</sub>N<sub>4</sub> and b) CoPPc@mpg-C<sub>3</sub>N<sub>4</sub>.

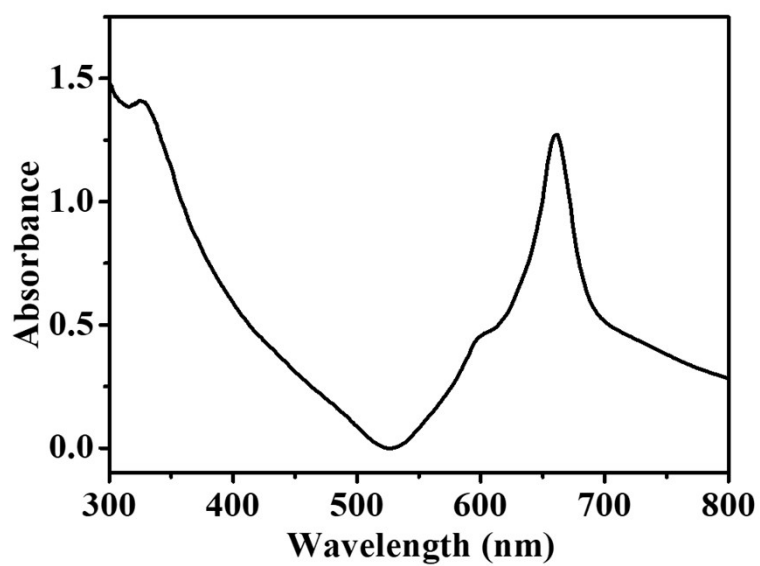

**Figure S6.** UV/Vis absorbance spectrum recorded from CoPc monomer in DMF.

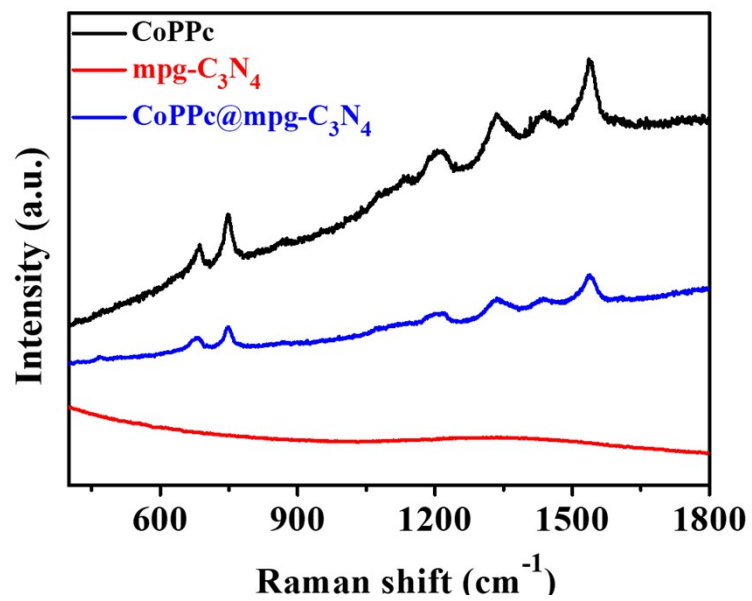

Figure S7. Raman spectra of CoPPc, mpg-C<sub>3</sub>N<sub>4</sub>, and CoPPc@mpg-C<sub>3</sub>N<sub>4</sub>.

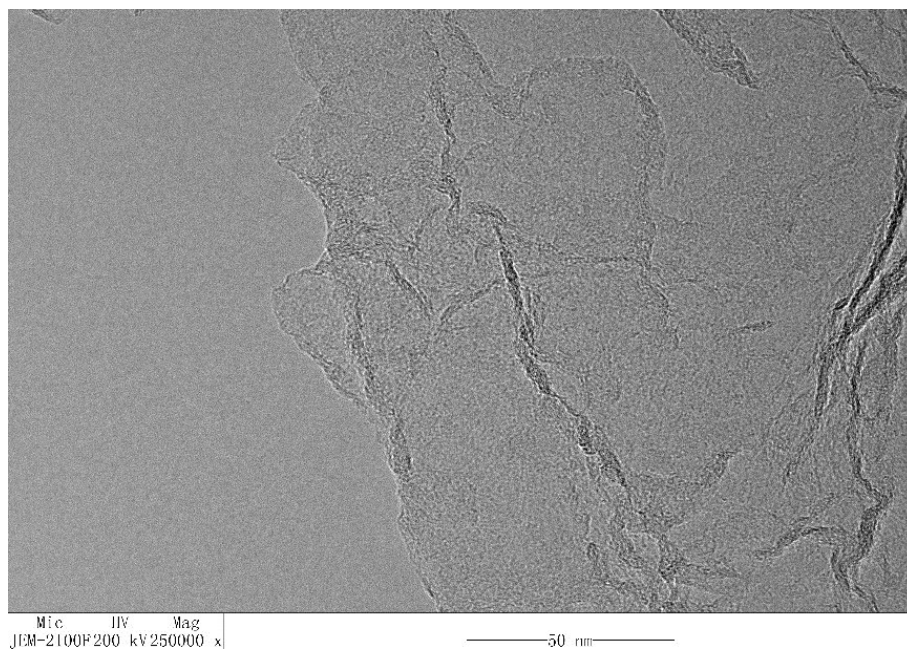

Figure S8. TEM image of bare mpg-C<sub>3</sub>N<sub>4</sub>.



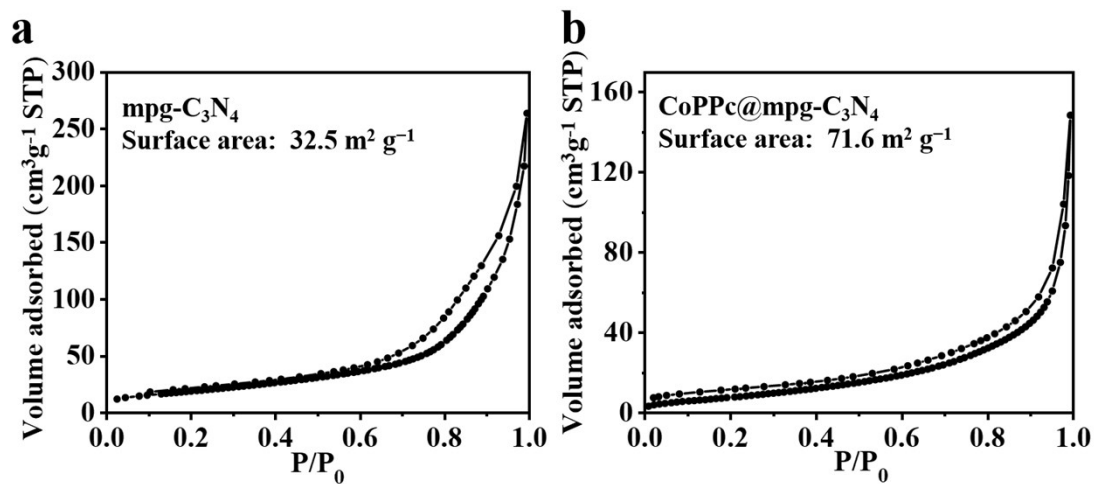

Figure S9. N<sub>2</sub> adsorption/desorption isotherms of a) mpg-C<sub>3</sub>N<sub>4</sub> and b) CoPPc@mpg-C<sub>3</sub>N<sub>4</sub>.

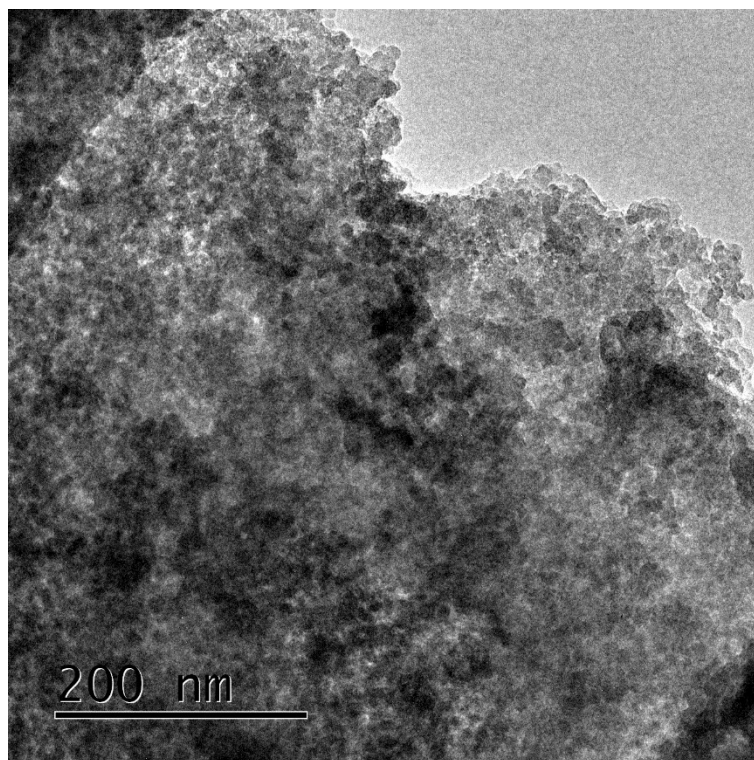

Figure S10. TEM image of CoPPc<sub>730</sub>@mpg-C<sub>3</sub>N<sub>4</sub>.

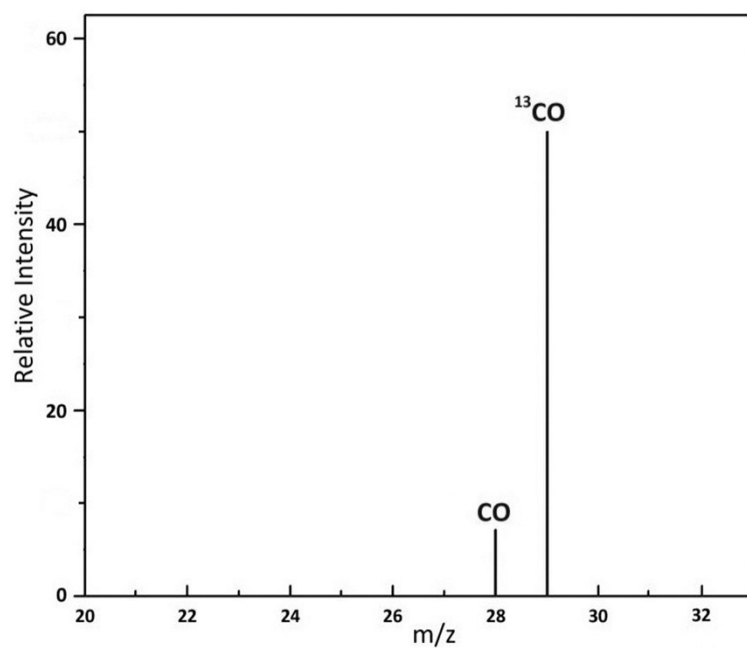

**Figure S11.** The mass spectrum of the CO GC peak obtained after long-term photocatalysis under <sup>13</sup>CO<sub>2</sub> atmosphere.

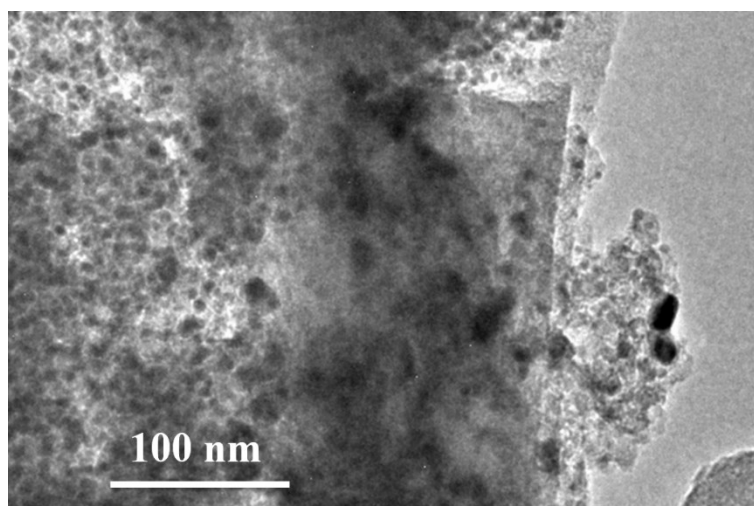

**Figure S12.** TEM image of CoPPc@mpg-C<sub>3</sub>N<sub>4</sub> recorded after long-term photocatalysis.

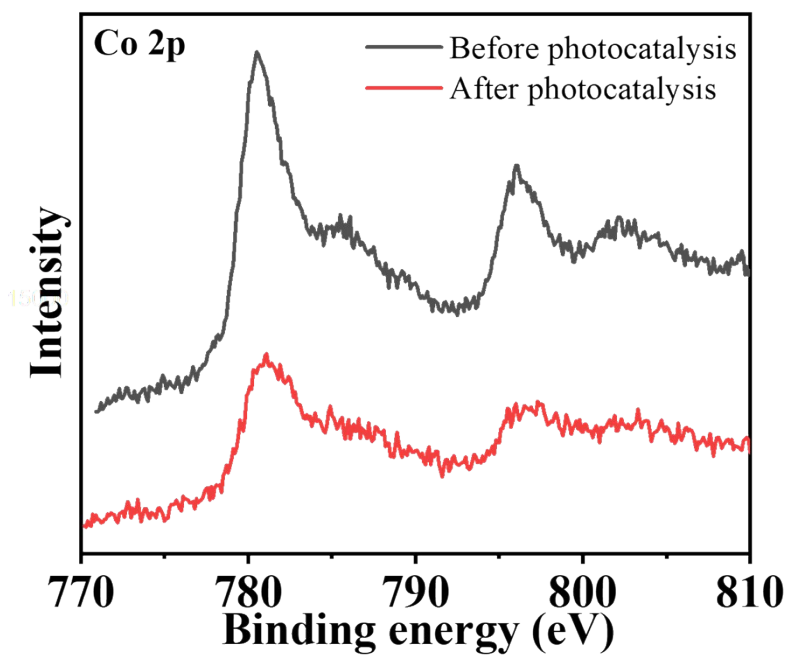

Figure S13. Co 2p core-level XPS spectra of CoPPc@mpg-C<sub>3</sub>N<sub>4</sub> before and after photocatalysis.

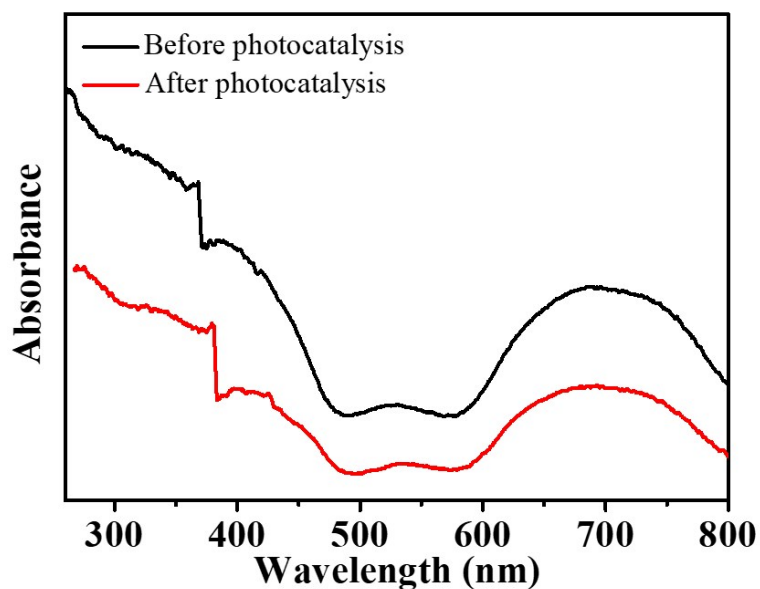

Figure S14. UV/Vis absorbance spectra of CoPPc@mpg-C<sub>3</sub>N<sub>4</sub> before and after photocatalysis.

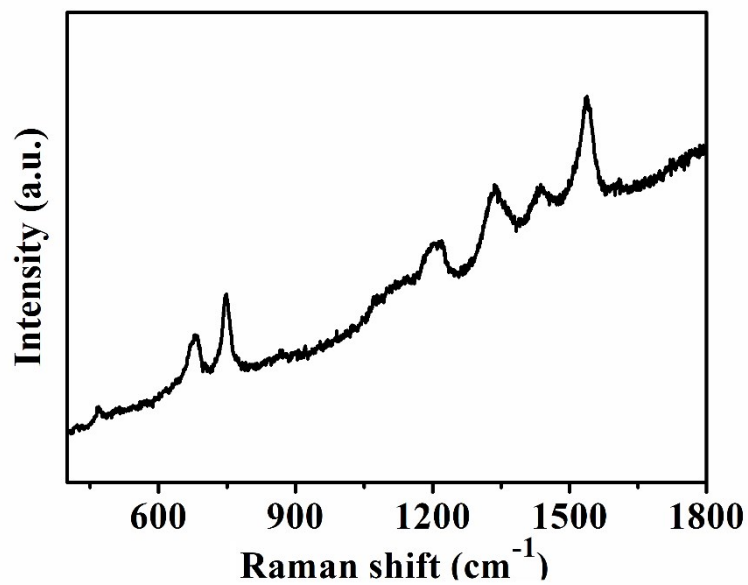

**Figure S15.** Raman spectrum of CoPPc@mpg-C<sub>3</sub>N<sub>4</sub> after long-term photocatalysis.

**Table S1.** The preparation of CoPPc@mpg-C<sub>3</sub>N<sub>4</sub> with various CoPPc loading by changing the ratio of starting materials.

| Photocatalyst                                               | Starting materials (mg)               |                                      |                               | Co content<br>( $\mu\text{mol Co g}^{-1}$ ) |
|-------------------------------------------------------------|---------------------------------------|--------------------------------------|-------------------------------|---------------------------------------------|
|                                                             | mpg-<br>C <sub>3</sub> N <sub>4</sub> | CoCl <sub>2</sub> ·6H <sub>2</sub> O | 1,2,4,5-<br>tetracyanobenzene |                                             |
| CoPPc <sub>221</sub> @mpg-<br>C <sub>3</sub> N <sub>4</sub> | 60                                    | 30                                   | 45                            | 221                                         |
| CoPPc <sub>356</sub> @mpg-<br>C <sub>3</sub> N <sub>4</sub> | 60                                    | 40                                   | 60                            | 356                                         |
| CoPPc <sub>509</sub> @mpg-<br>C <sub>3</sub> N <sub>4</sub> | 60                                    | 50                                   | 75                            | 509                                         |

|                                                             |    |    |     |     |
|-------------------------------------------------------------|----|----|-----|-----|
| CoPPc <sub>611</sub> @mpg-<br>C <sub>3</sub> N <sub>4</sub> | 60 | 60 | 90  | 611 |
| CoPPc <sub>730</sub> @mpg-<br>C <sub>3</sub> N <sub>4</sub> | 60 | 80 | 120 | 730 |

**Table S2.** Visible-light-driven CO<sub>2</sub> reduction under different reaction conditions.

| entry          | catalyst                                                    | product (μmol) |     |
|----------------|-------------------------------------------------------------|----------------|-----|
|                |                                                             | H <sub>2</sub> | CO  |
| 1 <sup>a</sup> | mpg-C <sub>3</sub> N <sub>4</sub>                           | 3.7            | 0   |
| 2 <sup>a</sup> | CoPPc                                                       | 0              | 0   |
| 3 <sup>b</sup> | CoPPc <sub>356</sub> @mpg-<br>C <sub>3</sub> N <sub>4</sub> | 0              | 0   |
| 4 <sup>c</sup> | CoPPc <sub>356</sub> @mpg-<br>C <sub>3</sub> N <sub>4</sub> | 5.8            | 0   |
| 5 <sup>d</sup> | CoPPc <sub>356</sub> @mpg-<br>C <sub>3</sub> N <sub>4</sub> | 0              | 0   |
| 6 <sup>e</sup> | CoPPc <sub>356</sub> @mpg-<br>C <sub>3</sub> N <sub>4</sub> | 1.4            | 2.8 |

<sup>a</sup>Reaction conditions: 5 mg of catalyst in a CO<sub>2</sub>-saturated MeCN solution containing 10% TEOA. Light source: UV-filtered Xe lamp (100 mW cm<sup>-2</sup>, λ > 400 nm). Reaction time: 8 h. <sup>b</sup>The reaction was conducted in a CO<sub>2</sub>-saturated MeCN solution without TEOA. <sup>c</sup>Under an argon atmosphere. <sup>d</sup>In the dark. <sup>e</sup>Irradiation of the photoreactor under visible light equipped with optical filter (λ > 455 nm).

**Table S3.** Comparison of CoPPc@mpg-C<sub>3</sub>N<sub>4</sub> with other g-C<sub>3</sub>N<sub>4</sub> based organic/inorganic photocatalysts.

| Photocatalyst                                                  | Product (CO)                    | TON <sub>CO</sub> | Ref. |
|----------------------------------------------------------------|---------------------------------|-------------------|------|
| g-C <sub>3</sub> N <sub>4</sub> -<br>C <sub>0.05</sub> /FeTCPP | 28.3 mmol g <sup>-1</sup> (6 h) | 24.9              | S1   |
| g-C <sub>3</sub> N <sub>4</sub> /FeTCPP                        | 6.52 mmol g <sup>-1</sup> (6 h) | 5.7               | S2   |

|                                         |                                         |               |           |
|-----------------------------------------|-----------------------------------------|---------------|-----------|
| CoPc@P-g-C <sub>3</sub> N <sub>4</sub>  | 295 μmol g <sup>-1</sup> (24 h)         | not mentioned | S3        |
| mpg-CN <sub>x</sub>  CoPPc              | 1000 μmol g <sup>-1</sup> (48 h)        | 84            | S4        |
| CoPPc@mpg-C <sub>3</sub> N <sub>4</sub> | 74.4 ± 0.5 mmol g <sup>-1</sup> (120 h) | 209           | This work |

## References

- S1. X. Zhang, L. Lin, Q. Dan, J. Yang, Y. Weng, Z. Wang, Z. Sun, Y. Chen and T. He, *Appl. Catal. B-Environ.*, 2020, **265**, 118595.
- S2. L. Lin, C. Hou, X. Zhang, Y. Wang, Y. Chen and T. He, *Appl. Catal. B-Environ.*, 2018, **221**, 312–319.
- S3. G. Liu, Y. Wang, Y. Zhou, J. Cao, M. Yuan and H. Lv, *J. Colloid Interf. Sci.*, 2021, **594**, 658–668.
- S4. S. Roy and E. Reisner, *Angew. Chem.*, 2019, **131**, 12308–12312.
